# Supplementary material
Source: PubMed Central journal article supplement (PMC8118974)
Supplement: AJNR-07-00278.pdf [file AJNR-07-00278.pdf]

**On-line Table: Summary of clinical and neuroradiologic findings in 10 patients with HCC**

| Patient/Sex                       | 1/M                                                            | 2/M                                                                           | 3/M                                                                   | 4/F                                                            | 5/M                                                | 6/M                                                 | 7/F                                                                                                 | 8/M                                  | 9/M                                  | 10/M                       |
|-----------------------------------|----------------------------------------------------------------|-------------------------------------------------------------------------------|-----------------------------------------------------------------------|----------------------------------------------------------------|----------------------------------------------------|-----------------------------------------------------|-----------------------------------------------------------------------------------------------------|--------------------------------------|--------------------------------------|----------------------------|
| Clinical findings                 |                                                                |                                                                               |                                                                       |                                                                |                                                    |                                                     |                                                                                                     |                                      |                                      |                            |
| Congenital cataract               | +                                                              | +                                                                             | +                                                                     | +                                                              | +                                                  | +                                                   | +                                                                                                   | +                                    | +                                    | +                          |
| Acquisition of supported walking  | 24 m                                                           | 18 m                                                                          | 12 m                                                                  | 14 m                                                           | 12 m                                               | 24 m                                                | 14 m                                                                                                | 13 m                                 | 14 m                                 | 24 m                       |
| Loss of supported walking         | NE                                                             | 8 y                                                                           | 8 y                                                                   | NA                                                             | 9 y                                                | 9 y                                                 | 8 y                                                                                                 | NE                                   | NE                                   | -                          |
| Pyramidal signs                   | +                                                              | +                                                                             | +                                                                     | +                                                              | +                                                  | +                                                   | +                                                                                                   | +                                    | +                                    | +                          |
| Cerebellar signs                  | +                                                              | +                                                                             | +                                                                     | +                                                              | +                                                  | +                                                   | +                                                                                                   | +                                    | +                                    | -                          |
| Mental retardation                | Mild                                                           | Mild                                                                          | Moderate                                                              | Mild                                                           | Moderate                                           | Mild                                                | Moderate                                                                                            | Mild                                 | Mild                                 | Mild                       |
| Seizures                          | +                                                              | -                                                                             | -                                                                     | -                                                              | +                                                  | -                                                   | -                                                                                                   | -                                    | +                                    | -                          |
| Neuroradiologic findings          |                                                                |                                                                               |                                                                       |                                                                |                                                    |                                                     |                                                                                                     |                                      |                                      |                            |
| Age at MRI                        | 2 y                                                            | 3 y                                                                           | 26 y                                                                  | 6 y                                                            | NT                                                 | 7 y                                                 | 8 y                                                                                                 | 20 m                                 | 20 m                                 | 16 y                       |
| Age at CT                         | NT                                                             | 3 y                                                                           | NT                                                                    | NT                                                             | 23 y                                               | 7 y                                                 | NT                                                                                                  | NT                                   | NT                                   | NT                         |
| Supratentorial WM Hypomyelination | Diffuse                                                        | Diffuse                                                                       | Diffuse                                                               | Diffuse                                                        | Not evaluable                                      | Diffuse                                             | Diffuse                                                                                             | Partly spared subcortical WM         | Partly spared subcortical WM         | Diffuse                    |
| Other WM findings                 | Increased water content; deep periventricular WM; A-P gradient | Increased water content (liquefaction); deep periventricular WM; A-P gradient | Diffuse WM atrophy/glios                                              | Localized areas of increased water content; deep frontal lobes | WM atrophy; hypodense (gliotic) periventricular WM | None                                                | Increased water content (liquefaction); frontoparietal, posterior, periventricular WM; A-P gradient | None                                 | None                                 | Diffuse WM atrophy/glios   |
| Corpus callosum                   | Thin splenium                                                  | Thin                                                                          | Thin                                                                  | Thin                                                           | NE                                                 | Thin                                                | Thin                                                                                                | Normal                               | Normal                               | Thin                       |
| Cerebellum                        | Hypomyelinated white core; normal medullary laminae            | Hypomyelinated white core; normal medullary laminae                           | Cortical atrophy; hypomyelinated white core; normal medullary laminae | Hypomyelinated white core; normal medullary laminae            | NE                                                 | Hypomyelinated white core; normal medullary laminae | Hypomyelinated white core; normal medullary laminae                                                 | Normal                               | Normal                               | Normal                     |
| Brain stem                        | Normal                                                         | Hyperintense corticospinal tracts                                             | Pons hypoplasia; hyperintense transverse fibers                       | Pons hypoplasia                                                | Pons hypoplasia                                    | Pons hypoplasia; hyperintense corticospinal tracts  | Pons hypoplasia                                                                                     | Hyperintense substantia nigra        | Normal                               | Pons hypoplasia            |
| Age at follow-up MRI              | NT                                                             | 8 and 16 y                                                                    | NT                                                                    | NT                                                             | NT                                                 | NT                                                  | 15 y                                                                                                | NT                                   | NT                                   | 17 y                       |
| Changes on follow-up MRI          | NA                                                             | Supratentorial WM atrophy                                                     | NA                                                                    | NA                                                             | NA                                                 | NA                                                  | Supratentorial WM atrophy                                                                           | NA                                   | NA                                   | Unchanged                  |
| MRS findings (age)                | NT                                                             | ↓ Cho/Cr (16 y)                                                               | NT                                                                    | NA                                                             | NT                                                 | NT                                                  | ↓ Cho/Cr (15 y)                                                                                     | ↑ mins/Cr, ↑ Cho/Cr, ↑ lipids (20 m) | ↑ mins/Cr, ↑ Cho/Cr, ↑ lipids (20 m) | ↑ mins, ↑ Cr, ↓ NAA (17 y) |

**Note:**—+ indicates present; -, absent; y, years; m, months; WM, white matter; NT, not tested; NE, not evaluable; MRI, magnetic resonance imaging; MRS, MR spectroscopy; A-P, anteroposterior; NA, not available; Cho, choline; Cr, creatine; mins, myo-inositol; NAA, N-acetylaspartate; ↑, increased; ↓, decreased.
